# Supplementary material for: Effectiveness of Internet- and mobile-based psychological interventions for the prevention of mental disorders: a systematic review and meta-analysis protocol
Source: Springer Nature journal article supplement (doi:10.1186/s13643-016-0209-5), 2016-02-16
Supplement: MOESM1 [file 9787748]

Additional File 1. Table showing the search strings for CENTRAL, MEDLINE and PsycINFO

|     | <b>CENTRAL</b>                                                                               | <b>MEDLINE</b>                                                                               | <b>PsycINFO</b>                                                                              |
|-----|----------------------------------------------------------------------------------------------|----------------------------------------------------------------------------------------------|----------------------------------------------------------------------------------------------|
| S1  | MeSH descriptor: [Telemedicine] explode all trees                                            | (MM "Telemedicine+")                                                                         | MM "Telemedicine"                                                                            |
| S2  | MeSH descriptor: [Therapy, Computer-Assisted] explode all trees                              | (MM "Therapy, Computer-Assisted+")                                                           | MM "Computer Assisted Therapy"                                                               |
| S3  | MeSH descriptor: [Computer-Assisted Instruction] explode all trees                           | (MM "Computer-Assisted Instruction")                                                         | MM "Computer Assisted Instruction+"                                                          |
| S4  | MeSH descriptor: [Mobile Applications] explode all trees                                     | (MM "Mobile Applications")                                                                   | MM "Mobile Devices+"                                                                         |
| S5  | MeSH descriptor: [Internet] explode all trees                                                | (MM "Internet+")                                                                             | MM "Internet"                                                                                |
| S6  | "computer applications": ti,ab,kw in Trials                                                  | AB "computer applications"                                                                   | AB "computer applications"                                                                   |
| S7  | "online therapy":ti,ab,kw in Trials                                                          | AB "online therapy"                                                                          | AB "online therapy"                                                                          |
| S8  | online:ti,ab,kw in Trials                                                                    | AB online                                                                                    | AB online                                                                                    |
| S9  | mobile:ti,ab,kw in Trials                                                                    | AB mobile                                                                                    | AB mobile                                                                                    |
| S10 | eHealth:ti,ab,kw in Trials                                                                   | AB eHealth                                                                                   | AB eHealth                                                                                   |
| S11 | web-based:ti,ab,kw in Trials                                                                 | AB web-based                                                                                 | AB web-based                                                                                 |
| S12 | computer-based:ti,ab,kw in Trials                                                            | AB computer-based                                                                            | AB computer-based                                                                            |
| S13 | computerized:ti,ab,kw in Trials                                                              | AB computerized                                                                              | AB computerized                                                                              |
| S14 | "world wide web":ti,ab,kw in Trials                                                          | AB "world wide web"                                                                          | AB "world wide web"                                                                          |
| S15 | cyber:ti,ab,kw in Trials                                                                     | AB cyber                                                                                     | AB cyber                                                                                     |
| S16 | #1 or #2 or #3 or #4 or #5 or #6 or #7 or #8 or #9 or #10 or #11 or #12 or #13 or #14 or #15 | S1 OR S2 OR S3 OR S4 OR S5 OR S6 OR S7 OR S8 OR S9 OR S10 OR S11 OR S12 OR S13 OR S14 OR S15 | S1 OR S2 OR S3 OR S4 OR S5 OR S6 OR S7 OR S8 OR S9 OR S10 OR S11 OR S12 OR S13 OR S14 OR S15 |
| S17 | MeSH descriptor: [Mental Disorders] explode all trees                                        | (MM "Mental Disorders+")                                                                     | MM "Mental Disorders+"                                                                       |
| S18 | MeSH descriptor: [Mentally Ill Persons] explode all trees                                    | (MM "Mentally Ill Persons")                                                                  | AB "mentally ill persons"                                                                    |
| S19 | "mental distress":ti,ab,kw in Trials                                                         | AB "mental distress"                                                                         | AB "mental distress"                                                                         |
| S20 | "psychiatric disorder*":ti,ab,kw in Trials                                                   | AB "psychiatric disorder*"                                                                   | AB "psychiatric disorder*"                                                                   |
| S21 | "psychological disorder*": ti,ab,kw in Trials                                                | AB "psychological disorder*"                                                                 | AB "psychological disorder*"                                                                 |
| S22 | "mental illness*":ti,ab,kw in Trials                                                         | AB "mental illness*"                                                                         | AB "mental illness*"                                                                         |
| S23 | MeSH descriptor: [Substance-Related Disorders] explode all trees                             | (MM "Substance-Related Disorders+")                                                          | AB "substance-related disorder*"                                                             |
| S24 | MeSH descriptor: [Alcohol-Related Disorders] explode all trees                               | (MM "Alcohol-Related Disorders+")                                                            | AB "alcohol-related disorder*"                                                               |
| S25 | "alcohol dependence":ti,ab,kw in Trials                                                      | AB "alcohol dependence"                                                                      | AB "alcohol dependence"                                                                      |
| S26 | "alcohol abuse":ti,ab,kw in Trials                                                           | AB "alcohol abuse"                                                                           | AB "alcohol abuse"                                                                           |
| S27 | "substance abuse":ti,ab,kw in Trials                                                         | AB "substance abuse"                                                                         | AB "substance abuse"                                                                         |

Additional File 1. Table showing the search strings for CENTRAL, MEDLINE and PsycINFO

|     |                                                                       |                                         |                                     |
|-----|-----------------------------------------------------------------------|-----------------------------------------|-------------------------------------|
| S28 | MeSH descriptor: [Psychotic Disorders] explode all trees              | (MM "Psychotic Disorders+")             | AB "psychotic disorder**"           |
| S29 | MeSH descriptor: [Schizophrenia] explode all trees                    | (MM "Schizophrenia+")                   | MM "Schizophrenia+"                 |
| S30 | MeSH descriptor: [Affective Disorders, Psychotic] explode all trees   | (MM "Affective Disorders, Psychotic+")  | AB "psychotic affective disorder**" |
| S31 | MeSH descriptor: [Mood Disorders] explode all trees                   | (MM "Mood Disorders+")                  | AB "mood disorder**"                |
| S32 | MeSH descriptor: [Depressive Disorder, Major] explode all trees       | (MM "Depressive Disorder, Major")       | MM "Major Depression+"              |
| S33 | MeSH descriptor: [Depression] explode all trees                       | (MM "Depression")                       | MM "Recurrent Depression"           |
| S34 | MeSH descriptor: [Bipolar Disorder] explode all trees                 | (MM "Bipolar Disorder+")                | MM "Bipolar Disorder+"              |
| S35 | MeSH descriptor: [Dysthymic Disorder] explode all trees               | (MM "Dysthymic Disorder")               | MM "Dysthymic Disorder"             |
| S36 | MeSH descriptor: [Depressive Disorder] explode all trees              | (MM "Depressive Disorder+")             | AB "depressive disorder**"          |
| S37 | MeSH descriptor: [Seasonal Affective Disorder] explode all trees      | (MM "Seasonal Affective Disorder")      | MM "Seasonal Affective Disorder"    |
| S38 | "affective disorder*":ti,ab,kw in Trials                              | AB "affective disorder**"               | MM "Affective Disorders+"           |
| S39 | depressive:ti,ab,kw in Trials                                         | AB depressive                           | AB depressive                       |
| S40 | depression:ti,ab,kw in Trials                                         | AB depression                           | AB depression                       |
| S41 | MeSH descriptor: [Anxiety] explode all trees                          | (MM "Anxiety+")                         | MM "Anxiety+"                       |
| S42 | MeSH descriptor: [Anxiety Disorders] explode all trees                | (MM "Anxiety Disorders+")               | MM "Anxiety Disorders+"             |
| S43 | MeSH descriptor: [Panic] explode all trees                            | (MM "Panic")                            | MM "Panic"                          |
| S44 | MeSH descriptor: [Panic Disorder] explode all trees                   | (MM "Panic Disorder")                   | MM "Panic Disorder"                 |
| S45 | MeSH descriptor: [Phobic Disorders] explode all trees                 | (MM "Phobic Disorders")                 | MM "Phobias+"                       |
| S46 | MeSH descriptor: [Agoraphobia] explode all trees                      | (MM "Agoraphobia")                      | AB agoraphobia                      |
| S47 | "anxiety disorder*":ti,ab,kw in Trials                                | AB "anxiety disorder**"                 | AB "anxiety disorder**"             |
| S48 | panic:ti,ab,kw in Trials                                              | AB panic                                | AB panic                            |
| S49 | phobi*:ti,ab,kw in Trials                                             | AB phobi*                               | AB phobi*                           |
| S50 | MeSH descriptor: [Obsessive-Compulsive Disorder] explode all trees    | (MM "Obsessive-Compulsive Disorder+")   | MM "Obsessive Compulsive Disorder"  |
| S51 | MeSH descriptor: [Impulse Control Disorders] explode all trees        | (MM "Impulse Control Disorders+")       | MM "Impulse Control Disorders+"     |
| S52 | MeSH descriptor: [Stress Disorders, Post-Traumatic] explode all trees | (MM "Stress Disorders, Post-Traumatic") | MM "Posttraumatic Stress Disorder"  |
| S53 | MeSH descriptor: [Stress Disorders, Traumatic] explode all trees      | (MM "Stress Disorders, Traumatic+")     | AB "traumatic stress disorder**"    |

Additional File 1. Table showing the search strings for CENTRAL, MEDLINE and PsycINFO

|     |                                                                                                                                                                                                                                                                                                                                                                                 |                                                                                                                                                                                                                                                                                                                                                                                 |                                                                                                                                                                                                                                                                                                                                                                   |
|-----|---------------------------------------------------------------------------------------------------------------------------------------------------------------------------------------------------------------------------------------------------------------------------------------------------------------------------------------------------------------------------------|---------------------------------------------------------------------------------------------------------------------------------------------------------------------------------------------------------------------------------------------------------------------------------------------------------------------------------------------------------------------------------|-------------------------------------------------------------------------------------------------------------------------------------------------------------------------------------------------------------------------------------------------------------------------------------------------------------------------------------------------------------------|
| S54 | MeSH descriptor: [Adjustment Disorders] explode all trees                                                                                                                                                                                                                                                                                                                       | (MM "Adjustment Disorders")                                                                                                                                                                                                                                                                                                                                                     | MM "Adjustment Disorders"                                                                                                                                                                                                                                                                                                                                         |
| S55 | PTSD:ti,ab,kw in Trials                                                                                                                                                                                                                                                                                                                                                         | AB PTSD                                                                                                                                                                                                                                                                                                                                                                         | AB PTSD                                                                                                                                                                                                                                                                                                                                                           |
| S56 | "posttraumatic stress disorder*":ti,ab,kw in Trials                                                                                                                                                                                                                                                                                                                             | AB "posttraumatic stress disorder*"                                                                                                                                                                                                                                                                                                                                             | AB "posttraumatic stress disorder*"                                                                                                                                                                                                                                                                                                                               |
| S57 | MeSH descriptor: [Somatoform Disorders] explode all trees                                                                                                                                                                                                                                                                                                                       | (MM "Somatoform Disorders+")                                                                                                                                                                                                                                                                                                                                                    | MM "Somatoform Disorders+"                                                                                                                                                                                                                                                                                                                                        |
| S58 | "somatic symptom disorder*":ti,ab,kw in Trials                                                                                                                                                                                                                                                                                                                                  | AB "somatic symptom disorder*"                                                                                                                                                                                                                                                                                                                                                  | AB "somatic symptom disorder*"                                                                                                                                                                                                                                                                                                                                    |
| S59 | somatoform:ti,ab,kw in Trials                                                                                                                                                                                                                                                                                                                                                   | AB somatoform                                                                                                                                                                                                                                                                                                                                                                   | AB somatoform                                                                                                                                                                                                                                                                                                                                                     |
| S60 | MeSH descriptor: [Eating Disorders] explode all trees                                                                                                                                                                                                                                                                                                                           | (MM "Eating Disorders+")                                                                                                                                                                                                                                                                                                                                                        | MM "Eating Disorders+"                                                                                                                                                                                                                                                                                                                                            |
| S61 | MeSH descriptor: [Anorexia] explode all trees                                                                                                                                                                                                                                                                                                                                   | (MM "Anorexia")                                                                                                                                                                                                                                                                                                                                                                 | -                                                                                                                                                                                                                                                                                                                                                                 |
| S62 | MeSH descriptor: [Anorexia Nervosa] explode all trees                                                                                                                                                                                                                                                                                                                           | (MM "Anorexia Nervosa")                                                                                                                                                                                                                                                                                                                                                         | MM "Anorexia Nervosa"                                                                                                                                                                                                                                                                                                                                             |
| S63 | MeSH descriptor: [Bulimia] explode all trees                                                                                                                                                                                                                                                                                                                                    | (MM "Bulimia")                                                                                                                                                                                                                                                                                                                                                                  | MM "Bulimia"                                                                                                                                                                                                                                                                                                                                                      |
| S64 | MeSH descriptor: [Bulimia Nervosa] explode all trees                                                                                                                                                                                                                                                                                                                            | (MM "Bulimia Nervosa")                                                                                                                                                                                                                                                                                                                                                          | -                                                                                                                                                                                                                                                                                                                                                                 |
| S65 | MeSH descriptor: [Binge-Eating Disorder] explode all trees                                                                                                                                                                                                                                                                                                                      | (MM "Binge-Eating Disorder")                                                                                                                                                                                                                                                                                                                                                    | MM "Binge Eating Disorder"                                                                                                                                                                                                                                                                                                                                        |
| S66 | anorexia:ti,ab,kw in Trials                                                                                                                                                                                                                                                                                                                                                     | AB anorexia                                                                                                                                                                                                                                                                                                                                                                     | AB anorexia                                                                                                                                                                                                                                                                                                                                                       |
| S67 | bulimia:ti,ab,kw in Trials                                                                                                                                                                                                                                                                                                                                                      | AB bulimia                                                                                                                                                                                                                                                                                                                                                                      | AB bulimia                                                                                                                                                                                                                                                                                                                                                        |
| S68 | MeSH descriptor: [Sleep Disorders] explode all trees                                                                                                                                                                                                                                                                                                                            | (MM "Sleep Disorders+")                                                                                                                                                                                                                                                                                                                                                         | MM "Sleep Disorders+"                                                                                                                                                                                                                                                                                                                                             |
| S69 | insomnia:ti,ab,kw in Trials                                                                                                                                                                                                                                                                                                                                                     | AB insomnia                                                                                                                                                                                                                                                                                                                                                                     | AB insomnia                                                                                                                                                                                                                                                                                                                                                       |
| S70 | #17 or #18 or #19 or #20 or #21 or #22 or #23 or #24 or #25 or #26 or #27 or #28 or #29 or #30 or #31 or #32 or #33 or #34 or #35 or #36 or #37 or #38 or #39 or #40 or #41 or #42 or #43 or #44 or #45 or #46 or #47 or #48 or #49 or #50 or #51 or #52 or #53 or #54 or #55 or #56 or #57 or #58 or #59 or #60 or #61 or #62 or #63 or #64 or #65 or #66 or #67 or #68 or #69 | S17 OR S18 OR S19 OR S20 OR S21 OR S22 OR S23 OR S24 OR S25 OR S26 OR S27 OR S28 OR S29 OR S30 OR S31 OR S32 OR S33 OR S34 OR S35 OR S36 OR S37 OR S38 OR S39 OR S40 OR S41 OR S42 OR S43 OR S44 OR S45 OR S46 OR S47 OR S48 OR S49 OR S50 OR S51 OR S52 OR S53 OR S54 OR S55 OR S56 OR S57 OR S58 OR S59 OR S60 OR S61 OR S62 OR S63 OR S64 OR S65 OR S66 OR S67 OR S68 OR S69 | S17 OR S18 OR S19 OR S20 OR S21 OR S22 OR S23 OR S24 OR S25 OR S26 OR S27 OR S28 OR S29 OR S30 OR S31 OR S32 OR S33 OR S34 OR S35 OR S36 OR S37 OR S38 OR S39 OR S40 OR S41 OR S42 OR S43 OR S44 OR S45 OR S46 OR S47 OR S48 OR S49 OR S50 OR S51 OR S52 OR S53 OR S54 OR S55 OR S56 OR S57 OR S58 OR S59 OR S60 OR S62 OR S63 OR S65 OR S66 OR S67 OR S68 OR S69 |
| S71 | random* in Trials                                                                                                                                                                                                                                                                                                                                                               | TX random*                                                                                                                                                                                                                                                                                                                                                                      | TX random*                                                                                                                                                                                                                                                                                                                                                        |
| S72 | "randomized controlled trial" in Trials                                                                                                                                                                                                                                                                                                                                         | TX "randomized controlled trial"                                                                                                                                                                                                                                                                                                                                                | TX "randomized controlled trial"                                                                                                                                                                                                                                                                                                                                  |
| S73 | "controlled clinical trial" in Trials                                                                                                                                                                                                                                                                                                                                           | TX "controlled clinical trial"                                                                                                                                                                                                                                                                                                                                                  | TX "controlled clinical trial"                                                                                                                                                                                                                                                                                                                                    |
| S74 | RCT in Trials                                                                                                                                                                                                                                                                                                                                                                   | TX RCT                                                                                                                                                                                                                                                                                                                                                                          | TX RCT                                                                                                                                                                                                                                                                                                                                                            |
| S75 | "clinical trial" in Trials                                                                                                                                                                                                                                                                                                                                                      | TX "clinical trial"                                                                                                                                                                                                                                                                                                                                                             | TX "clinical trial"                                                                                                                                                                                                                                                                                                                                               |
| S76 | #71 or #72 #73 #74 #75                                                                                                                                                                                                                                                                                                                                                          | S71 OR S72 OR S73 OR S74 OR S75                                                                                                                                                                                                                                                                                                                                                 | S71 OR S72 OR S73 OR S74 OR S75                                                                                                                                                                                                                                                                                                                                   |
| S77 | prevent* in Trials                                                                                                                                                                                                                                                                                                                                                              | TX prevent*                                                                                                                                                                                                                                                                                                                                                                     | TX prevent*                                                                                                                                                                                                                                                                                                                                                       |
| S78 | MeSH descriptor: [Numbers Needed To Treat] explode all trees                                                                                                                                                                                                                                                                                                                    | (MM "Numbers Needed To Treat")                                                                                                                                                                                                                                                                                                                                                  | -                                                                                                                                                                                                                                                                                                                                                                 |
| S79 | "number needed to treat":ti,ab,kw in Trials                                                                                                                                                                                                                                                                                                                                     | AB "number needed to treat"                                                                                                                                                                                                                                                                                                                                                     | AB "number needed to treat"                                                                                                                                                                                                                                                                                                                                       |

Additional File 1. Table showing the search strings for CENTRAL, MEDLINE and PsycINFO

|     |                                                      |                                                      |                                                      |
|-----|------------------------------------------------------|------------------------------------------------------|------------------------------------------------------|
| S80 | "number needed to be treated":ti,ab,kw in Trials     | AB "number needed to be treated"                     | AB "number needed to be treated"                     |
| S81 | "relative risk":ti,ab,kw in Trials                   | AB "relative risk"                                   | AB "relative risk"                                   |
| S82 | onset:ti,ab,kw in Trials                             | AB onset                                             | AB onset                                             |
| S83 | incidence:ti,ab,kw in Trials                         | AB incidence                                         | AB incidence                                         |
| S84 | incident:ti,ab,kw in Trials                          | AB incident                                          | AB incident                                          |
| S85 | #77 or #78 or #79 or #80 or #81 or #82 or #83 or #84 | S77 OR S78 OR S79 OR S80 OR S81 OR S82 OR S83 OR S84 | S77 OR S78 OR S79 OR S80 OR S81 OR S82 OR S83 OR S84 |
| S86 | #16 and #70 and #76 and #85                          | S16 AND S70 AND S76 AND S85                          | S16 AND S70 AND S76 AND S85                          |
